# Supplementary material
Source: Springer Nature journal article supplement (https://www.springermedizin.de/resource/supplementary/12885_2006_568_MOESM2_ESM.pdf/9469796)

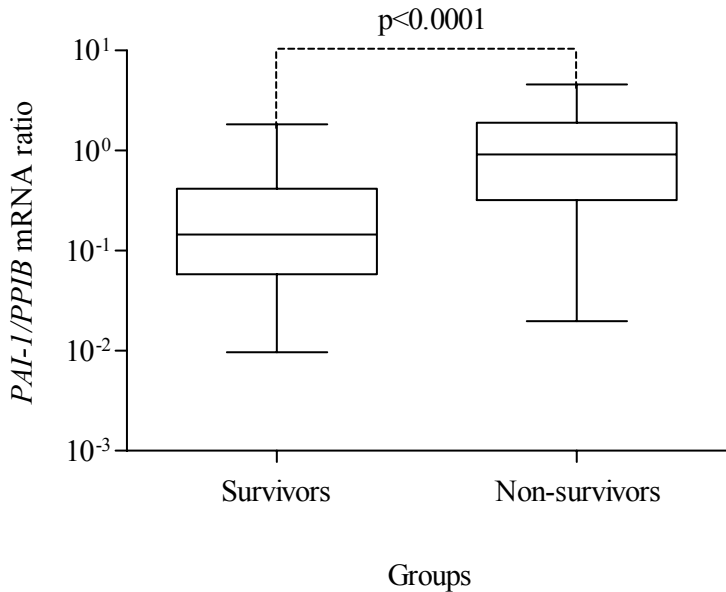

Supplement: MOESM2 [file 9469796]
